# Supplementary material for: Old Trade, New Tricks: Insights into the Spontaneous Mutation Process from the Partnering of Classical Mutation Accumulation Experiments with High-Throughput Genomic Approaches
Source: PubMed Central journal article supplement — Genome Biol Evol. 2018 Nov 26;11(1):136–65. doi: 10.1093/gbe/evy252 (PMC6330053; doi:10.1093/gbe/evy252), 2018-11-26
Supplement: evy252_supp.pdf [file evy252_supp.pdf]

## SUPPLEMENTARY MATERIAL

**Katju and Bergthorsson.** *“Old trade, new tricks: insights into the spontaneous mutation process from the partnering of classical mutation accumulation experiments with high-throughput genomic approaches.”*

**Table S1.** Phenotypic and direct molecular estimates of the genome-wide mutation rate  $U$  from spontaneous mutation accumulation experiments.

**Table S2.** Mutation rate from whole-genome sequencing of spontaneous mutation accumulation experiments as a function of genome size and effective population size,  $N_e$ .

**Table S1.** Phenotypic and direct molecular estimates of the genome-wide mutation rate  $U$  from spontaneous mutation accumulation experiments.  $U$  is the number of mutations per genome per generation. BM, MD and ML denote Bateman-Mukai, minimum-distance and maximum likelihood approaches to estimating  $U$  from phenotypic data, respectively.  $\mu_{bs}$  is the genome-wide, direct molecular estimate of the base substitution rate from WGS of spontaneous mutation accumulation lines and represented as base substitutions per site per generation.  $G$  is the genome size in Mb. \* indicates fitness assay under stress or competitive conditions.

| Group                  | Species                  | Phenotypic Trait     | BM or ML based phenotypic estimate of $U$ | Reference for phenotype-based $U$ | $\mu_{bs}$ from MA-WGS                           | Reference for $\mu_{bs}$              | $G$               |
|------------------------|--------------------------|----------------------|-------------------------------------------|-----------------------------------|--------------------------------------------------|---------------------------------------|-------------------|
| Prokaryotes            | <i>E. coli</i>           | $r$                  | 0.00017                                   | Kibota & Lynch 1996               | $2.20 \times 10^{-10}$<br>$3.12 \times 10^{-10}$ | Lee et al. 2012<br>Foster et al. 2015 | 4.21              |
|                        | <i>B. cenocepacia</i>    | Competition-TSOY     | 0.00007                                   | Dillon & Cooper 2016              | $1.33 \times 10^{-10}$                           | Dillon et al. 2015                    | 3.48              |
|                        |                          | Competition-M9MM     | 0.00006                                   | Dillon & Cooper 2016              |                                                  |                                       |                   |
| Competition-M9MM+CA    |                          | 0.00006              | Dillon & Cooper 2016                      |                                   |                                                  |                                       |                   |
| Unicellular Eukaryotes | <i>B. prasinus</i>       | Cell division rate   | 0.00380                                   | Krasovec et al. 2016              | $3.02 \times 10^{-10}$                           | Krasovec et al. 2017                  | 15.07             |
|                        | <i>C. reinhardtii</i>    | Maximal growth rate  | 0.00202                                   | Morgan et al. 2014                | $6.76 \times 10^{-11}$<br>$9.63 \times 10^{-10}$ | Sung et al. 2012a<br>Ness et al. 2015 | 120.41            |
|                        |                          | <i>D. discoideum</i> | Plate growth (ML)                         | 0.00010                           | Hall et al. 2013                                 | $2.90 \times 10^{-11}$                | Saxer et al. 2012 |
|                        | Liquid growth (BM)       |                      | 0.00390                                   | Hall et al. 2013                  |                                                  |                                       |                   |
|                        | Liquid growth (ML)       |                      | 0.00190                                   | Hall et al. 2013                  |                                                  |                                       |                   |
|                        | Slug distance (BM)       |                      | 0.00050                                   | Hall et al. 2013                  |                                                  |                                       |                   |
|                        | Total FBs (BM)           |                      | 0.00020                                   | Hall et al. 2013                  |                                                  |                                       |                   |
|                        | Total FBs (ML)           |                      | 0.00270                                   | Hall et al. 2013                  |                                                  |                                       |                   |
|                        | Spores per FB (BM)       |                      | 0.00250                                   | Hall et al. 2013                  |                                                  |                                       |                   |
|                        | Spores per FB (ML)       |                      | 0.00260                                   | Hall et al. 2013                  |                                                  |                                       |                   |
|                        | Spore germination (BM)   |                      | 0.00330                                   | Hall et al. 2013                  |                                                  |                                       |                   |
|                        | Competitive ability (ML) |                      | 0.00150                                   | Hall et al. 2013                  |                                                  |                                       |                   |
|                        | <i>M. pusilla</i>        | Cell division rate   | 0.00370                                   | Krasovec et al. 2016              | $8.15 \times 10^{-10}$                           | Krasovec et al. 2017                  | 21.11             |
|                        | <i>O. mediterraneus</i>  | Cell division rate   | 0.00370                                   | Krasovec et al. 2016              | $4.92 \times 10^{-10}$                           | Krasovec et al. 2017                  | 13.48             |
|                        | <i>S. cerevisiae</i>     | $r$                  | 0.00055                                   | Wloch et al. 2001                 | $3.30 \times 10^{-10}$                           | Lynch et al. 2008                     | 12.16             |
|                        |                          | $w$                  | 0.00005                                   | Zeyl & DeVisser 2001              | $2.90 \times 10^{-10}$                           | Nishant et al. 2010                   |                   |
|                        |                          | MGR                  | 0.00006                                   | Joseph & Hall 2004                | $3.60 \times 10^{-10}$                           | Serero et al. 2014                    |                   |
|                        |                          | MGR                  | 0.00014                                   | Hall et al. 2008                  | $1.67 \times 10^{-10}$                           | Zhu et al. 2014                       |                   |
|                        |                          | SE                   | 0.00019                                   | Hall & Joseph 2010                |                                                  |                                       |                   |
|                        |                          | $r$                  | 0.00013                                   | Hall & Joseph 2010                |                                                  |                                       |                   |
| $r$                    |                          | 0.03300              | Brito et al. 2010                         | $7.61 \times 10^{-12}$            | Long et al. 2016                                 |                                       |                   |
| <i>T. thermophila</i>  | $r$                      | 0.00470              | Long et al. 2013                          |                                   | 103.01                                           |                                       |                   |

Multicellular  
Eukaryotes

|                        |                                    |                       |                               |                       |                       |                       |        |
|------------------------|------------------------------------|-----------------------|-------------------------------|-----------------------|-----------------------|-----------------------|--------|
| <i>A. thaliana</i>     | <i>LRS</i>                         | 0.05000               | Schultz et al. 1999           | 7.10×10 <sup>-9</sup> | Ossowski et al. 2010  | 119.67                |        |
|                        | <i>Number of fruits</i>            | 0.00400               | Shaw et al. 2000              |                       |                       |                       |        |
|                        | <i>Seeds/fruit</i>                 | 0.00015               | Shaw et al. 2000              |                       |                       |                       |        |
| <i>C. briggsae</i>     | <i>w (BM)</i>                      | 0.03700               | Baer et al. 2005              | 1.33×10 <sup>-9</sup> | Denver et al. 2012    | 108.38                |        |
|                        | <i>w (BM)</i>                      | 0.01200               | Baer et al. 2005              |                       |                       |                       |        |
| <i>C. elegans</i>      | <i>Productivity (BM)</i>           | 0.00065               | Keightley & Caballero 1997    | 1.45×10 <sup>-9</sup> | Denver et al. 2012    | 100.29                |        |
|                        | <i>r (BM)</i>                      | 0.00350               | Keightley & Caballero 1997    |                       |                       |                       |        |
|                        | <i>Productivity (ML)</i>           | 0.00350               | Keightley & Caballero 1997    |                       |                       |                       |        |
|                        | <i>Productivity (BM)</i>           | 0.02400               | Vassilieva et al. 1999, 2000  |                       |                       |                       |        |
|                        | <i>Productivity (ML)</i>           | 0.00750               | Vassilieva et al. 1999, 2000  |                       |                       |                       |        |
|                        | <i>r (BM)</i>                      | 0.00680               | Vassilieva et al. 1999, 2000  |                       |                       |                       |        |
|                        | <i>r (ML)</i>                      | 0.01800               | Vassilieva et al. 1999, 2000  |                       |                       |                       |        |
|                        | <i>w (BM)</i>                      | 0.00420               | Baer et al. 2005              |                       |                       |                       |        |
|                        | <i>w (BM)</i>                      | 0.00330               | Baer et al. 2005              |                       |                       |                       |        |
|                        | <i>Productivity (ML)</i>           | 0.00700               | Katju et al. 2015             |                       |                       |                       |        |
|                        | <i>Survivorship to adult (ML)</i>  | 0.00280               | Katju et al. 2015             |                       |                       |                       |        |
|                        | <i>Productivity (ML)*</i>          | 0.00580               | Katju et al. 2018             |                       |                       |                       |        |
|                        | <i>Survivorship to adult (ML)*</i> | 0.00440               | Katju et al. 2018             |                       |                       |                       |        |
|                        | <i>D. melanogaster</i>             | <i>Viability (BM)</i> | 0.35000                       | Mukai 1964            | 3.46×10 <sup>-9</sup> | Keightley et al. 2009 | 143.73 |
|                        |                                    | <i>Viability (BM)</i> | 0.47000                       | Mukai et al. 1972     | 5.49×10 <sup>-9</sup> | Schrider et al. 2013  |        |
| <i>Viability (ML)</i>  |                                    | 0.01100               | Mukai et al. 1972             | 6.03×10 <sup>-9</sup> | Sharp & Agrawal 2016  |                       |        |
| <i>Viability (BM)</i>  |                                    | 0.14000               | Ohnishi 1977                  | 4.90×10 <sup>-9</sup> | Assaf et al. 2018     |                       |        |
| <i>Viability (ML)</i>  |                                    | 0.01000               | Ohnishi 1977                  |                       |                       |                       |        |
| <i>Fitness (ML)</i>    |                                    | 0.03000               | Houle et al. 1992             |                       |                       |                       |        |
| <i>w (BM)*</i>         |                                    | 0.00150               | García-Dorado et al. 1998     |                       |                       |                       |        |
| <i>Viability (BM)</i>  |                                    | 0.02000               | Fernández & López-Fanjul 1996 |                       |                       |                       |        |
| <i>Viability (BM)*</i> |                                    | 0.02000               | Fry et al. 1999               |                       |                       |                       |        |
| <i>Viability (BM)</i>  |                                    | 0.00310               | Caballero et al. 2002         |                       |                       |                       |        |
| <i>Viability (MD)</i>  |                                    | 0.00500               | Caballero et al. 2002         |                       |                       |                       |        |
| <i>w (BM)*</i>         |                                    | 0.03700               | Ávila & García-Dorado 2002    |                       |                       |                       |        |
| <i>Viability (BM)*</i> |                                    | 0.01200               | Charlesworth et al. 2004      |                       |                       |                       |        |
| <i>Viability (BM)*</i> |                                    | 0.03000               | Charlesworth et al. 2004      |                       |                       |                       |        |
| <i>Viability (BM)*</i> |                                    | 0.03900               | Charlesworth et al. 2004      |                       |                       |                       |        |
| <i>Viability (BM)*</i> |                                    | 0.34000               | Gong et al. 2005              |                       |                       |                       |        |
| <i>Viability (BM)*</i> |                                    | 0.10000               | Gong et al. 2005              |                       |                       |                       |        |
| <i>Viability (BM)*</i> | 0.40000                            | Gong et al. 2005      |                               |                       |                       |                       |        |

**Table S2.** Spontaneous base substitution mutation rates generated via whole-genome sequencing (WGS) of mutation accumulation experiments.  $G$  is the genome size in Mb.  $N_e$  is the estimated effective population size for the species.  $\mu_{bs}$  is the genome-wide, direct molecular estimate of the base substitution rate from WGS of spontaneous mutation accumulation lines and represented as base substitutions per site per generation.  $U$  is the number of mutations per genome per generation.

| Group                    | Species                         | $G$    | $N_e$              | Reference for $N_e$             | $\mu_{bs}$ from MA-WGS | Reference for $\mu_{bs}$ | $U$     |
|--------------------------|---------------------------------|--------|--------------------|---------------------------------|------------------------|--------------------------|---------|
| Prokaryotes              |                                 |        |                    |                                 |                        |                          |         |
|                          | <i>B. subtilis</i> NCIB 3610    | 4.21   | $6.30 \times 10^7$ | Sung et al. 2015                | $3.28 \times 10^{-10}$ | Sung et al. 2015         | 0.00138 |
|                          | <i>B. cenocepacia</i>           | 8.01   | $2.47 \times 10^8$ | Dillon et al. 2015              | $1.33 \times 10^{-10}$ | Dillon et al. 2015       | 0.00102 |
|                          | <i>D. radiodurans</i>           | 3.26   | –                  | –                               | $4.99 \times 10^{-10}$ | Long et al. 2015         | –       |
|                          | <i>E. coli</i> K12              | 4.64   | $2.50 \times 10^7$ | Charlesworth & Eyre-Walker 2006 | $2.20 \times 10^{-10}$ | Lee et al. 2012          | 0.00112 |
|                          |                                 |        |                    |                                 | $3.12 \times 10^{-10}$ | Foster et al. 2015       |         |
|                          | <i>M. florum</i> L1             | 0.79   | $1.10 \times 10^6$ | Sung et al. 2012a               | $9.78 \times 10^{-9}$  | Sung et al. 2012a, 2015  | 0.00782 |
|                          | <i>P. aeruginosa</i>            | 6.26   | $2.00 \times 10^7$ | Dettman et al. 2016             | $7.90 \times 10^{-11}$ | Dettman et al. 2016      | 0.00052 |
|                          | <i>S. typhimurium</i> LT2       | 4.86   | –                  | –                               | $7.00 \times 10^{-10}$ | Lind & Andersson 2008    | –       |
|                          | <i>V. cholerae</i> 2740-80      | 4.09   | $4.78 \times 10^8$ | Dillon et al. 2017              | $1.07 \times 10^{-10}$ | Dillon et al. 2017       | 0.00043 |
|                          | <i>V. fischeri</i> ES114        | 4.27   | $1.62 \times 10^8$ | Dillon et al. 2017              | $2.07 \times 10^{-10}$ | Dillon et al. 2017       | 0.00088 |
| Unicellular Eukaryotes   |                                 |        |                    |                                 |                        |                          |         |
|                          | <i>B. prasinus</i> RC1105       | 15.07  | –                  | –                               | $3.02 \times 10^{-10}$ | Krasovec et al. 2017     | –       |
|                          | <i>C. reinhardtii</i>           | 120.41 | $3.10 \times 10^7$ | Ness et al. 2015                | $6.76 \times 10^{-11}$ | Sung et al. 2012a        | 0.06201 |
|                          |                                 |        |                    |                                 | $9.63 \times 10^{-10}$ | Ness et al. 2015         |         |
|                          | <i>D. discoideum</i>            | 34.21  | $6.90 \times 10^6$ | Flowers et al. 2010             | $2.90 \times 10^{-11}$ | Saxer et al. 2012        | 0.00099 |
|                          | <i>M. pusilla</i> RCC299        | 21.11  | –                  | –                               | $8.15 \times 10^{-10}$ | Krasovec et al. 2017     | –       |
|                          | <i>O. mediterraneus</i> RCC2590 | 13.48  | –                  | –                               | $4.92 \times 10^{-10}$ | Krasovec et al. 2017     | –       |
|                          | <i>O. tauri</i> RCC4221         | 13.03  | $2.00 \times 10^7$ | Krasovec et al. 2017            | $4.19 \times 10^{-10}$ | Krasovec et al. 2017     | 0.00545 |
|                          | <i>P. tetraurelia</i>           | 72.09  | $1.24 \times 10^8$ | Sung et al. 2012b               | $1.94 \times 10^{-11}$ | Sung et al. 2012b        | 0.00140 |
|                          | <i>S. cerevisiae</i>            | 12.16  | $6.20 \times 10^6$ | Zhu et al. 2014                 | $3.30 \times 10^{-10}$ | Lynch et al. 2008        | 0.00349 |
|                          |                                 |        |                    |                                 | $2.90 \times 10^{-10}$ | Nishant et al. 2010      |         |
|                          |                                 |        |                    |                                 | $1.67 \times 10^{-10}$ | Zhu et al. 2014          |         |
|                          | <i>S. pombe</i>                 | 12.59  | $2.60 \times 10^6$ | Farlow et al. 2015              | $2.13 \times 10^{-10}$ | Farlow et al. 2015       | 0.00241 |
|                          |                                 |        |                    |                                 | $1.70 \times 10^{-10}$ | Behringer & Hall 2016    |         |
|                          | <i>T. thermophila</i>           | 103.01 | $1.12 \times 10^8$ | Long et al. 2016                | $7.61 \times 10^{-12}$ | Long et al. 2016         | 0.00078 |
| Multicellular Eukaryotes |                                 |        |                    |                                 |                        |                          |         |

|                        |         |                    |                      |                       |                       |          |
|------------------------|---------|--------------------|----------------------|-----------------------|-----------------------|----------|
| <i>A. thaliana</i>     | 119.67  | $2.50 \times 10^5$ | Ossowski et al. 2010 | $7.10 \times 10^{-9}$ | Ossowski et al. 2010  | 0.84966  |
| <i>C. briggsae</i>     | 108.38  | $2.67 \times 10^5$ | Lynch et al. 2016    | $1.33 \times 10^{-9}$ | Denver et al. 2012    | 0.14415  |
| <i>C. elegans</i>      | 100.29  | $5.41 \times 10^5$ | Lynch et al. 2016    | $2.10 \times 10^{-9}$ | Denver et al. 2009    | 0.17801  |
|                        |         |                    |                      | $1.45 \times 10^{-9}$ | Denver et al. 2012    |          |
| <i>D. pulex</i>        | 197.21  | $7.82 \times 10^5$ | Lynch et al. 2017    | $3.80 \times 10^{-9}$ | Keith et al. 2016     | 0.74940  |
| <i>D. melanogaster</i> | 143.73  | $8.63 \times 10^5$ | Lynch et al. 2016    | $3.46 \times 10^{-9}$ | Keightley et al. 2009 | 0.72152  |
|                        |         |                    |                      | $5.49 \times 10^{-9}$ | Schrider et al. 2013  |          |
|                        |         |                    |                      | $6.03 \times 10^{-9}$ | Sharp & Agrawal 2016  |          |
|                        |         |                    |                      | $4.90 \times 10^{-9}$ | Assaf et al. 2018     |          |
| <i>M. musculus</i>     | 2818.97 | $1.77 \times 10^5$ | Lynch et al. 2016    | $5.40 \times 10^{-9}$ | Uchimura et al. 2015  | 15.22244 |
| <i>P. pacificus</i>    | 154.96  | $1.75 \times 10^6$ | Lynch et al. 2016    | $2.00 \times 10^{-9}$ | Weller et al. 2014    | 0.30992  |

---

## Literature Cited

- Assaf ZJ, Tilk S, Park J, Siegal ML, Petrov DA. 2018. Deep sequencing of natural and experimental populations of *Drosophila melanogaster* reveals biases in the spectrum of new mutations. *Genome Res.* 27:1988–2000.
- Ávila V, García-Dorado A. 2002. The effects of spontaneous mutation on competitive fitness in *Drosophila melanogaster*. *J Evol Biol.* 15:561–566.
- Baer CF, et al. 2005. Comparative evolutionary genetics of spontaneous mutations affecting fitness in rhabditid nematodes. *Proc Natl Acad Sci U S A.* 102:5785–5790.
- Behringer MG, Hall DW. 2016. Genome-wide estimates of mutation rates and spectrum in *Schizosaccharomyces pombe* indicate CpG sites are highly mutagenic despite the absence of DNA methylation. *G3.* 12:149–160.
- Brito PH, Guilherme E, Soares H, Gordo I. 2010. Mutation accumulation in *Tetrahymena*. *BMC Evolutionary Biol.* 10:354.
- Caballero A, Cusi E, García C, García-Dorado A. 2002. Accumulation of deleterious mutations: additional *Drosophila melanogaster* estimates and a simulation of the effects of selection. *Evolution.* 56:1150–1159.
- Charlesworth B, Borthwick H, Bartolomé C, Pignatelli P. 2004. Estimates of the genomic mutation rate for detrimental alleles in *Drosophila melanogaster*. *Genetics.* 167: 815–826.
- Charlesworth J, Eyre-Walker A. 2006. The rate of adaptive evolution in enteric bacteria. *Mol Biol Evol.* 23:1348–1356.
- Denver DR, et al. 2009. A genome-wide view of *Caenorhabditis elegans* base-substitution

- mutation processes. *Proc Natl Acad Sci U S A.* 106:16310–16314.
- Denver DR, et al. 2012. Variation in base-substitution mutation in experimental and natural lineages of *Caenorhabditis* nematodes. *Genome Biol Evol.* 4:513–522.
- Dettman JR, Sztepanacz JL, Kassen R. 2016. The properties of spontaneous mutations in the opportunistic pathogen *Pseudomonas aeruginosa*. *BMC Genomics.* 17:27.
- Dillon MM, Cooper VS. 2016. The fitness effects of spontaneous mutations nearly unseen by selection in a bacterium with multiple chromosomes. *Genetics.* 204:1225–1238.
- Dillon MM, Sung W, Lynch M, Cooper VS. 2015. The rate and molecular spectrum of spontaneous mutations in the GC-Rich multichromosome genome of *Burkholderia cenocepacia*. *Genetics.* 200:935–946.
- Dillon MM, Sung W, Sebra R, Lynch M, Cooper VS. 2017. Genome-wide biases in the rate and molecular spectrum of spontaneous mutations in *Vibrio cholerae* and *Vibrio fischeri*. *Mol Biol Evol.* 34:93–109.
- Farlow A, et al. 2015. The spontaneous mutation rate in the fission yeast *Schizosaccharomyces pombe*. *Genetics.* 201:737–744.
- Fernández J, López-Fanjul C. 1996. Spontaneous mutational variances and covariances for fitness-related traits in *Drosophila melanogaster*. *Genetics.* 143:829–837.
- Flowers JM, et al. 2010. Variation, sex, and social cooperation: molecular population genetics of the social amoeba *Dictyostelium discoideum*. *PLoS Genet.* 6:e1001013.
- Foster PL, Lee H, Popodi EM, Townes JP, Tang H. 2015. Determinants of spontaneous mutation in the bacterium *Escherichia coli* as revealed by whole-genome sequencing. *Proc Natl Acad Sci U S A.* 112:E5990–E5999.

- Fry JD, Keightley PD, Heinsohn SL, Nuzhdin SV. 1999. New estimates of the rates and effects of mildly deleterious mutation in *Drosophila melanogaster*. Proc Natl Acad Sci U S A. 96:574–579.
- García-Dorado A, Monedero JL, López-Fanjul C. 1998. The mutation rate and the distribution of mutational effects of viability and fitness in *Drosophila melanogaster*. Genetica. 103:255–265.
- Gong Y, Woodruff RC, Thompson JN. 2005. Deleterious genomic mutation rate for viability in *Drosophila melanogaster* using concomitant sibling controls. Biol Lett. 1: 492–495.
- Hall DW, Fox S, Kuzdzal-Fick JJ, Strassmann JE, Quellar DC. 2013. The rate and effects of spontaneous mutation on fitness traits in the social amoeba, *Dictyostelium discoideum*. G3 (Bethesda). 3:1115–1127.
- Hall DW, Joseph SB. 2010. A high frequency of beneficial mutations across multiple fitness components in *Saccharomyces cerevisiae*. Genetics. 185:1397–1409.
- Houle D, Hoffmaster DK, Assimacopoulos S, Charlesworth B. 1992. The genomic mutation rate for fitness in *Drosophila*. Nature. 359:58–60.
- Joseph SB, Hall DW. 2004. Spontaneous mutations in diploid *Saccharomyces cerevisiae*: more beneficial than expected. Genetics. 168:1817–1825.
- Joseph S, Hall DW. 2008. Spontaneous mutations in diploid *Saccharomyces cerevisiae*: another thousand cell generations. Genet Res. 90:229–241.
- Katju V, Packard LB, Bu L, Keightley PD, Bergthorsson U. 2015. Fitness decline in spontaneous mutation accumulation lines of *Caenorhabditis elegans* with varying effective population sizes. Evolution. 69:104–116.
- Katju V, Packard LB, Keightley PD. 2018. Fitness decline under osmotic stress in



- Caenorhabditis elegans* populations subjected to spontaneous mutation accumulation at varying population sizes. *Evolution*. 72:1000–1008.
- Keightley PD, Caballero A. 1997. Genomic mutation rates for lifetime reproductive output and lifespan in *Caenorhabditis elegans*. *Proc Natl Acad Sci U S A*. 94:3823–3827.
- Keightley PD, et al. 2009. Analysis of the genome sequences of three *Drosophila melanogaster* spontaneous mutation accumulation lines. *Genome Res*. 19:1195–1201.
- Keith N, et al. 2016. High mutational rates of large-scale duplication and deletion in *Daphnia pulex*. *Genome Res*. 26:60–69.
- Kibota TT, Lynch M. 1996. Estimate of the genomic mutation rate deleterious to overall fitness in *E. coli*. *Nature*. 381:694–696.
- Krasovec M, et al. 2016. Fitness effects of spontaneous mutations in picoeukaryotic marine green algae. *G3 (Bethesda)*. 6:2063–2071.
- Krasovec M, Eyre-Walker A, Sanchez-Ferandin S, Piganeau G. 2017. Spontaneous mutation rate in the smallest photosynthetic eukaryotes. *Mol Biol Evol*. 34:1770–1779.
- Lee H, Popodi E, Tang H, Foster PL. 2012. Rate and molecular spectrum of of spontaneous mutations in the bacterium *Escherichia coli* as determined by whole-genome sequencing. *Proc Natl Acad Sci U S A*. 109:E2774–E2783.
- Lind PA, Andersson DI. 2008. Whole-genome mutational biases in bacteria. *Proc Natl Acad Sci U S A*. 105:17878-17883.
- Long H-A, Paixao T, Azevedo RBR, Zufall RA. 2013. Accumulation of spontaneous mutations in the ciliate *Tetrahymena thermophila*. *Genetics*. 195:527–540.
- Long H, et al. 2015. Background mutational features of the radiation-resistant bacterium *Deinococcus radiodurans*. *Mol Biol Evol*. 32:2383–2392.

- Long et al. 2016. Low base-substitution mutation rate in the germline genome of the ciliate *Tetrahymena thermophila*. *Genome Biol Evol.* 8:3629–3639.
- Lynch M, et al. 2008. A genome-wide view of the spectrum of spontaneous mutations in yeast. *Proc Natl Acad Sci U S A.* 105:9272–9277.
- Lynch M, et al. 2016. Genetic drift, selection and the evolution of the mutation rate. *Nat Rev Genet.* 17:704–714.
- Lynch M, et al. 2017. Population Genomics of *Daphnia pulex*. *Genetics.* 206:315–332.
- Morgan AD, Ness RW, Keightley PD, Colegrave N. 2014. Spontaneous mutation accumulation in multiple strains of the green alga, *Chlamydomonas reinhardtii*. *Evolution.* 68:2589–2602.
- Mukai T. 1964. The genetic structure of natural populations of *Drosophila melanogaster*. I. Spontaneous mutation rate of polygenes controlling viability. *Genetics.* 50:1–19.
- Mukai T, Chigusa SI, Mettler LE, Crow JF. 1972. Mutation rate and dominance of genes affecting viability in *Drosophila melanogaster*. *Genetics.* 72:335–355.
- Ness RW, Morgan AD, Vasanthakrishnan RB, Colegrave N, Keightley PD. 2015. Extensive de novo mutation rate variation between individuals and across the genome of *Chlamydomonas reinhardtii*. *Genome Res.* 25:1739–1749.
- Nishant KT, et al. 2010. The baker's yeast diploid genome is remarkably stable in vegetative growth and meiosis *PLoS Genet.* 6:e1001109.
- Ohnishi O. 1977. Spontaneous and ethyl methanesulfonate-induced mutations controlling viability in *Drosophila melanogaster*. II. Homozygous effect of polygenic mutations. *Genetics.* 87:529–545.
- Ossowski S, et al. 2010. The rate and molecular spectrum of spontaneous mutations in

- Arabidopsis thaliana*. *Science* 327: 92–94.
- Saxer G, et al. 2012. Whole genome sequencing of mutation accumulation lines reveals a low mutation rate in the social amoeba *Dictyostelium discoideum*. *PLoS One* 7:e46759.
- Schrider DR, Houle D, Lynch M, Hahn MW. 2013. Rates and genomic consequences of spontaneous mutational events in *Drosophila melanogaster*. *Genetics*. 194:937–954.
- Schultz ST, Lynch M, Willis JH. 1999. Spontaneous deleterious mutation in *Arabidopsis thaliana*. *Proc Natl Acad Sci U S A*. 96:11393–11398.
- Serero A, Jubin C, Loeillet S, Legoix-Né P, Nicolas AG. 2014. Mutational landscape of yeast mutator strains. *Proc Natl Acad Sci U S A*. 111:1897–1902.
- Sharp NP, Agrawal AF. 2016. Low genetic quality alters key dimension of the mutational spectrum. *PLoS Biol*. 14:e1002419.
- Shaw RG, Byers DL, Darmo E. 2000. Spontaneous mutational effects on reproductive traits of *Arabidopsis thaliana*. *Genetics*. 155:369–378.
- Sung W, et al. 2012a. Drift-barrier hypothesis and mutation-rate evolution. *Proc Natl Acad Sci U S A*. 109:18488–18492.
- Sung W, et al. 2012b. Extraordinary genome stability in the ciliate *Paramecium tetraurelia*. *Proc Natl Acad Sci U S A*. 109:19339–19344.
- Sung W, et al. 2015. Asymmetric context-dependent mutation patterns revealed through mutation-accumulation experiments. *Mol Biol Evol*. 32:1672–1683.
- Uchimura A, et al. 2015. Germline mutation rates and the long-term phenotypic effects of mutation accumulation in wild-type laboratory mice and mutator mice. *Genome Res*. 25:1125–1134.
- Vassilieva LL, Hook AM, Lynch M. The fitness effects of spontaneous mutations in

- Caenorhabditis elegans*. *Evolution*. 2000 54:1234–1246.
- Vassilieva LL, Lynch M. 1999. The rate of spontaneous mutation for life-history traits in *Caenorhabditis elegans*. *Genetics*. 151:119–129.
- Weller AM, Röderlsperger C, Eberhardt G, Molnar RI, Sommer RJ. 2014. Opposing forces of A/T-biased mutations and G/C-biased gene conversions shape the genome of the nematode *Pristionchus pacificus*. *Genetics* 196:1145–1452.
- Wloch DM, Szafraniec K, Borts R, Korona R. 2001. Direct estimate of the mutation rate and distribution of fitness effects in the yeast *Saccharomyces cerevisiae*. *Genetics*. 159:441–452.
- Zeyl C, DeVisser JAGM. 2001. Estimates of the rate and distribution of fitness effects of spontaneous mutation in *Saccharomyces cerevisiae*. *Genetics*. 157:53–61.
- Zhu YO, Siegal ML, Hall DW, Petrov DA. 2014. Precise estimates of mutation rate and spectrum in yeast. *Proc Natl Acad Sci U S A*. 111:E2310–E2318.
